# Supplementary material for: A Positive Relationship between Exposure to Heavy Metals and Development of Chronic Diseases: A Case Study from Chile
Source: MDPI journal article supplement (doi:10.3390/ijerph18041419), 2021-02-03
Supplement: s1 [file s1]

# Supplementary Table S1.

Linear regression models for the biochemical parameters which were statistically influenced by some metals, adjusted by age and sex.

| Dependent variable | Explanatory variables           | Coefficients |                |                 | Model          |                         |                  |
|--------------------|---------------------------------|--------------|----------------|-----------------|----------------|-------------------------|------------------|
|                    |                                 | $\beta$      | Standard error | <i>p</i> -value | R <sup>2</sup> | Adjusted R <sup>2</sup> | <i>p</i> -value  |
| Glycemia           | Age (years)                     | -0.78        | 0.37           | 0.836           | 0.70           | <b>0.62</b>             | <b>&lt;0.001</b> |
|                    | Sex (male)                      | 15.33        | 4.67           | 0.004           |                |                         |                  |
|                    | Dimethylarsinic acid (µg/L)     | -7,34        | 2,32           | 0.005           |                |                         |                  |
|                    | <b>Inorganic arsenic (µg/L)</b> | <b>7,37</b>  | <b>2,31</b>    | <b>0.005</b>    |                |                         |                  |
|                    | <b>Nickel (µg/L)</b>            | <b>7,90</b>  | <b>2,04</b>    | <b>0.001</b>    |                |                         |                  |
| IL-6               | Age (years)                     | -0.05        | 0.06           | 0.447           | 0.25           | 0.14                    | 0.106            |
|                    | Sex                             | -0.11        | 0,77           | 0.886           |                |                         |                  |
|                    | Nickel (µg/L)                   | 0.71         | 0.30           | 0.025           |                |                         |                  |
| Cholesterol        | Age (years)                     | -1,88        | 1,14           | 0.113           | 0.27           | 0.17                    | 0.077            |
|                    | Sex                             | 16,16        | 17,15          | 0.357           |                |                         |                  |
|                    | <b>Arsenobetaine (µg/L)</b>     | <b>0,70</b>  | <b>0,32</b>    | <b>0.042</b>    |                |                         |                  |

For sex variable, women are the reference group.

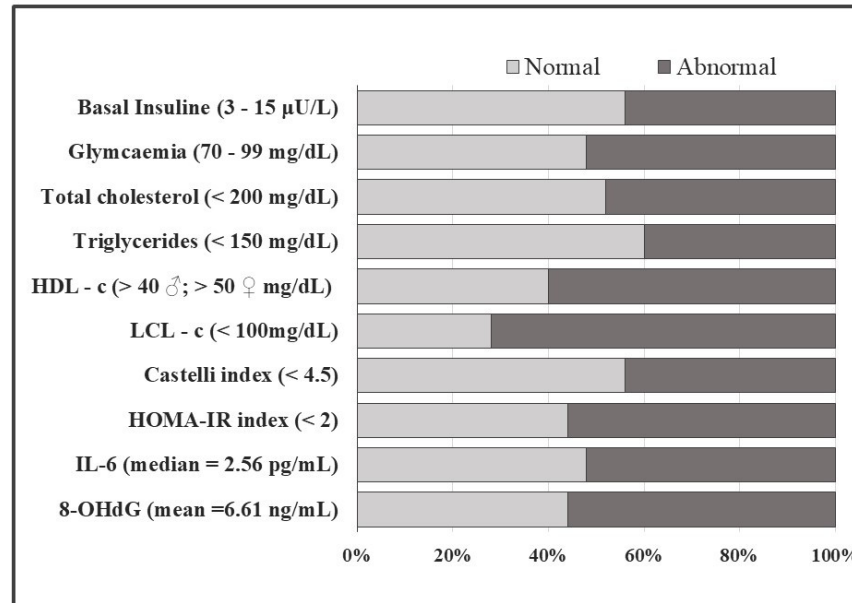

**Supplementary Figure S1.** Percentages of individuals with normal and altered biochemical parameters according to the National Health Survey (16, 21), or above and below of measurements of central tendency, according to their distribution, of the clinical parameters measured (median for IL-6; mean for 8-OHdG). See Table I for the dispersion values of the clinical parameters.
